# Supplementary material
Source: publisher site journal article supplement (https://www.spandidos-publications.com/7556/downloadSupplementary)
Supplement: Supplementary file 1 [file downloadSupplementary]

Video S1. Visible bright floating objects. The video obtained by the authors from a 14-year-old male patient undergoing lung transplantation for obliterative bronchiolitis.

Video S2. 'Kissing papillary muscles'. The video obtained by the authors from a 59-year-old female patient undergoing lung transplantation for interstitial lung disease.
